# Supplementary material for: Diagnostic accuracy of a rapid RT-PCR assay for point-of-care detection of influenza A/B virus at emergency department admission: A prospective evaluation during the 2017/2018 influenza season
Source: PubMed Central journal article supplement (PMC6504036; doi:10.1371/journal.pone.0216308), 2019-05-07
Supplement: pone.0216308.s002.pdf [file pone.0216308.s002.pdf]

| rum_inclusior | lenght_stay_ED | age    | gender | BMI   | institution | charlson |
|---------------|----------------|--------|--------|-------|-------------|----------|
| 10            | 07:52:00       | 31,00  | 0,00   | 19,59 | 0,00        | 0,00     |
| 13            | 07:49:00       | 91,00  | 1,00   | 22,22 | 0,00        | 2,00     |
| 11            | 01:31:00       | 44,00  | 0,00   |       | 0,00        | 0,00     |
| 12            | 04:15:00       | 87,00  | 0,00   | 25,35 | 0,00        | 2,00     |
| 15            | 02:04:00       | 55,00  | 1,00   | 36,11 | 0,00        | 1,00     |
| 14            | 10:23:00       | 101,00 | 0,00   |       | 0,00        | 0,00     |
| 16            | 08:15:00       | 95,00  | 1,00   | 22,89 | 1,00        | 5,00     |
| 17            | 04:05:00       | 82,00  | 0,00   |       | 0,00        | 2,00     |
| 145           | 11:10:00       | 81,00  | 0,00   | 22,95 | 0,00        | 3,00     |
| 18            | 06:48:00       | 84,00  | 0,00   |       | 0,00        | 4,00     |
| 19            | 05:58:00       | 80,00  | 1,00   | 30,85 | 0,00        | 0,00     |
| 150           | 07:33:00       | 73,00  | 0,00   | 37,98 | 0,00        | 7,00     |
| 90            | 05:14:00       | 89,00  | 1,00   | 31,98 | 0,00        | 5,00     |
| 89            | 06:44:00       | 89,00  | 1,00   |       | 0,00        | 6,00     |
| 86            | 02:07:00       | 89,00  | 1,00   | 21,22 | 0,00        |          |
| 29            | 01:36:00       | 20,00  | 1,00   |       | 0,00        | 0,00     |
| 87            | 04:11:00       | 65,00  | 1,00   | 27,34 | 0,00        | 3,00     |
| 79            | 05:27:00       | 72,00  | 0,00   | 24,22 | 0,00        | 3,00     |
| 138           | 08:30:00       | 24,00  | 1,00   |       | 0,00        | 0,00     |
| 181           | 07:54:00       | 47,00  | 1,00   |       | 0,00        | 0,00     |
| 9             | 02:36:00       | 26,00  | 0,00   | 28,40 | 0,00        | 0,00     |
| 6             | 11:51:00       | 53,00  | 1,00   | 21,22 | 0,00        | 1,00     |
| 3             | 22:24:00       | 68,00  | 0,00   | 26,54 | 0,00        | 2,00     |
| 113           | 01:55:00       | 42,00  | 1,00   |       | 0,00        | 0,00     |
| 4             | 04:36:00       | 87,00  | 0,00   | 24,22 | 1,00        | 5,00     |
| 1             | 07:33:00       | 49,00  | 0,00   |       | 0,00        | 2,00     |
| 2             | 07:34:00       | 75,00  | 1,00   | 19,07 | 0,00        | 3,00     |
| 110           | 05:57:00       | 78,00  | 0,00   |       | 0,00        | 2,00     |
| 171           | 06:27:00       | 78,00  | 0,00   |       | 0,00        | 0,00     |
| 163           | 01:14:00       | 27,00  | 0,00   |       | 0,00        | 0,00     |
| 76            | 06:01:00       | 94,00  | 1,00   | 44,19 | 0,00        | 3,00     |
| 136           | 03:33:00       | 28,00  | 1,00   |       | 0,00        | 0,00     |
| 75            | 07:50:00       | 30,00  | 1,00   | 27,17 | 1,00        | 0,00     |
| 119           | 05:10:00       | 47,00  | 0,00   |       | 0,00        | 0,00     |
| 132           | 05:23:00       | 62,00  | 1,00   |       | 0,00        | 1,00     |
| 77            | 00:34:00       | 26,00  | 0,00   |       | 0,00        | 0,00     |
| 159           | 04:24:00       | 87,00  | 1,00   | 14,83 | 0,00        | 2,00     |
| 96            | 04:40:00       | 66,00  | 0,00   | 21,55 | 0,00        |          |
| 100           | 06:38:00       | 79,00  | 0,00   | 20,76 | 1,00        | 11,00    |
| 98            | 04:14:00       | 20,00  | 1,00   |       | 0,00        | 0,00     |
| 95            | 06:57:00       | 82,00  | 0,00   | 30,85 | 0,00        | 3,00     |
| 186           | 05:05:00       | 87,00  | 1,00   |       | 1,00        | 2,00     |
| 94            | 03:18:00       | 91,00  | 0,00   | 15,67 | 1,00        | 3,00     |
| 97            | 01:55:00       | 55,00  | 1,00   | 21,37 | 0,00        | 0,00     |
| 170           | 02:31:00       | 25,00  | 0,00   |       | 0,00        |          |
| 92            | 09:34:00       | 30,00  | 1,00   | 19,92 | 0,00        | 0,00     |
| 118           | 07:32:00       | 24,00  | 0,00   |       | 0,00        | 0,00     |
| 126           | 06:17:00       | 73,00  | 1,00   |       | 0,00        | 1,00     |
| 127           | 02:19:00       | 95,00  | 1,00   |       | 0,00        | 0,00     |

|     |          |       |      |       |      |      |
|-----|----------|-------|------|-------|------|------|
| 111 | 03:25:00 | 44,00 | 1,00 |       | 0,00 | 2,00 |
| 39  | 07:21:00 | 54,00 | 1,00 | 23,44 | 0,00 | 2,00 |
| 38  | 07:19:00 | 89,00 | 0,00 | 24,22 | 0,00 | 6,00 |
| 42  | 09:06:00 | 87,00 | 0,00 | 20,18 | 0,00 |      |
| 177 | 23:47:00 | 45,00 | 1,00 |       | 0,00 | 1,00 |
| 116 | 14:28:00 | 84,00 | 0,00 |       | 0,00 | 4,00 |
| 41  | 06:07:00 | 65,00 | 1,00 | 37,89 | 0,00 | 0,00 |
| 40  | 10:03:00 | 84,00 | 1,00 | 23,44 | 0,00 | 2,00 |
| 187 | 04:57:00 | 72,00 | 0,00 | 25,91 | 0,00 | 7,00 |
| 43  | 04:41:00 | 50,00 | 1,00 | 26,42 | 0,00 | 0,00 |
| 148 | 00:46:00 | 87,00 | 1,00 |       | 0,00 | 7,00 |
| 34  | 07:14:00 | 19,00 | 1,00 | 26,95 | 0,00 | 0,00 |
| 35  | 04:44:00 | 23,00 | 1,00 |       | 0,00 | 0,00 |
| 121 | 05:39:00 | 70,00 | 1,00 |       | 0,00 | 2,00 |
| 133 | 07:41:00 | 79,00 | 0,00 |       | 0,00 | 5,00 |
| 153 | 06:00:00 | 87,00 | 1,00 | 21,63 | 0,00 | 1,00 |
| 176 | 07:39:00 | 81,00 | 1,00 |       | 0,00 | 3,00 |
| 158 | 05:20:00 | 40,00 | 1,00 | 19,57 | 0,00 | 1,00 |
| 184 | 01:32:00 | 39,00 | 0,00 |       | 0,00 |      |
| 88  | 04:53:00 | 65,00 | 1,00 | 27,34 | 0,00 | 2,00 |
| 78  | 02:34:00 | 97,00 | 0,00 |       | 0,00 |      |
| 32  | 23:01:00 | 27,00 | 1,00 | 19,15 | 0,00 | 0,00 |
| 36  | 05:46:00 | 62,00 | 0,00 |       | 0,00 | 1,00 |
| 37  | 13:55:00 | 88,00 | 1,00 |       | 1,00 | 1,00 |
| 31  | 12:30:00 | 79,00 | 0,00 | 27,34 | 0,00 |      |
| 33  | 05:38:00 | 23,00 | 1,00 | 26,12 | 0,00 | 0,00 |
| 81  | 04:39:00 | 36,00 | 0,00 | 27,78 | 0,00 | 0,00 |
| 30  | 06:02:00 | 95,00 | 1,00 |       | 1,00 | 2,00 |
| 80  | 03:39:00 | 80,00 | 1,00 | 29,30 | 0,00 | 3,00 |
| 84  | 04:13:00 | 86,00 | 1,00 |       | 1,00 | 6,00 |
| 82  | 05:14:00 | 78,00 | 0,00 | 27,76 | 0,00 | 1,00 |
| 83  | 07:07:00 | 52,00 | 0,00 | 24,68 | 0,00 | 0,00 |
| 85  | 05:51:00 | 71,00 | 0,00 |       | 0,00 | 1,00 |
| 185 | 05:31:00 | 78,00 | 1,00 | 23,96 | 0,00 | 9,00 |
| 108 | 09:35:00 | 77,00 | 0,00 |       | 0,00 | 3,00 |
| 147 | 14:01:00 | 64,00 | 0,00 |       | 1,00 | 5,00 |
| 144 | 15:36:00 | 78,00 | 0,00 | 24,17 | 0,00 | 3,00 |
| 28  | 07:47:00 | 64,00 | 1,00 |       | 0,00 | 0,00 |
| 27  | 00:50:00 | 50,00 | 1,00 |       | 0,00 | 0,00 |
| 25  | 06:04:00 | 67,00 | 1,00 |       | 0,00 | 5,00 |
| 26  | 09:30:00 | 81,00 | 0,00 | 28,40 | 0,00 | 2,00 |
| 24  | 08:09:00 | 71,00 | 1,00 |       | 0,00 | 3,00 |
| 169 | 05:10:00 | 81,00 | 0,00 |       | 0,00 | 2,00 |
| 23  | 07:01:00 | 90,00 | 1,00 | 34,17 | 0,00 | 1,00 |
| 114 | 16:37:00 | 95,00 | 1,00 |       | 1,00 | 2,00 |
| 66  | 23:26:00 | 89,00 | 1,00 | 27,06 | 1,00 | 4,00 |
| 59  | 20:20:00 | 92,00 | 1,00 |       | 0,00 |      |
| 141 | 19:50:00 | 84,00 | 0,00 | 28,13 | 0,00 | 0,00 |
| 115 | 05:00:00 | 53,00 | 1,00 |       | 0,00 | 1,00 |
| 22  | 06:05:00 | 89,00 | 1,00 | 21,23 | 0,00 |      |

|     |          |       |      |       |      |       |
|-----|----------|-------|------|-------|------|-------|
| 61  | 18:01:00 | 55,00 | 1,00 | 41,44 | 0,00 | 9,00  |
| 21  | 04:40:00 | 40,00 | 0,00 | 31,18 | 0,00 | 0,00  |
| 54  | 18:00:00 | 69,00 | 0,00 | 23,74 | 0,00 |       |
| 20  | 06:13:00 | 97,00 | 1,00 | 27,89 | 1,00 | 2,00  |
| 60  | 18:37:00 | 84,00 | 1,00 |       | 0,00 | 4,00  |
| 63  | 14:55:00 | 87,00 | 0,00 | 34,60 | 1,00 | 3,00  |
| 57  | 14:48:00 | 79,00 | 0,00 | 24,21 | 0,00 | 5,00  |
| 58  | 04:23:00 | 65,00 | 1,00 |       | 0,00 | 1,00  |
| 62  | 04:58:00 | 20,00 | 0,00 |       | 0,00 | 0,00  |
| 51  | 13:09:00 | 38,00 | 0,00 | 25,76 | 1,00 | 0,00  |
| 64  | 13:34:00 | 85,00 | 1,00 | 25,78 | 0,00 | 0,00  |
| 50  | 15:19:00 | 86,00 | 0,00 | 20,83 | 1,00 |       |
| 53  | 12:30:00 | 82,00 | 0,00 | 29,76 | 0,00 | 4,00  |
| 56  | 09:56:00 | 51,00 | 0,00 | 39,84 | 0,00 | 3,00  |
| 154 | 07:00:00 | 64,00 | 0,00 | 21,19 | 0,00 | 4,00  |
| 47  | 06:14:00 | 84,00 | 0,00 | 22,13 | 0,00 | 2,00  |
| 52  | 04:46:00 | 84,00 | 1,00 |       | 0,00 | 0,00  |
| 134 | 07:54:00 | 33,00 | 0,00 |       | 0,00 | 0,00  |
| 46  | 06:15:00 | 60,00 | 0,00 | 24,69 | 0,00 | 6,00  |
| 49  | 08:19:00 | 61,00 | 1,00 |       | 0,00 | 0,00  |
| 122 | 07:35:00 | 23,00 | 1,00 |       | 0,00 | 0,00  |
| 48  | 01:51:00 | 38,00 | 1,00 | 27,68 | 0,00 | 0,00  |
| 149 | 08:18:00 | 88,00 | 1,00 |       | 0,00 | 5,00  |
| 125 | 02:42:00 | 22,00 | 0,00 |       | 0,00 | 0,00  |
| 183 | 18:56:00 | 70,00 | 1,00 | 27,81 | 0,00 | 8,00  |
| 180 | 09:53:00 | 25,00 | 0,00 |       | 0,00 | 0,00  |
| 157 | 10:10:00 | 76,00 | 1,00 | 19,34 | 0,00 | 2,00  |
| 142 | 01:47:00 | 40,00 | 1,00 |       | 0,00 | 0,00  |
| 137 | 09:21:00 | 53,00 | 0,00 | 25,26 | 0,00 | 2,00  |
| 45  | 03:29:00 | 31,00 | 0,00 |       | 0,00 | 0,00  |
| 117 | 06:29:00 | 86,00 | 0,00 |       | 0,00 | 2,00  |
| 70  | 18:03:00 | 33,00 | 0,00 | 27,78 | 0,00 | 0,00  |
| 73  | 01:55:00 | 59,00 | 1,00 | 32,42 | 1,00 | 3,00  |
| 65  | 01:43:00 | 27,00 | 1,00 |       | 0,00 | 0,00  |
| 140 | 09:29:00 | 73,00 | 0,00 |       | 1,00 | 0,00  |
| 69  | 09:54:00 | 88,00 | 1,00 |       | 0,00 | 10,00 |
| 152 | 05:11:00 | 37,00 | 1,00 |       | 0,00 | 0,00  |
| 104 | 03:45:00 | 82,00 | 0,00 |       | 0,00 |       |
| 71  | 23:45:00 | 22,00 | 1,00 | 22,58 | 0,00 | 0,00  |
| 68  | 08:10:00 | 85,00 | 0,00 |       | 0,00 | 5,00  |
| 146 | 07:57:00 | 95,00 | 0,00 |       | 1,00 | 0,00  |
| 139 | 07:14:00 | 81,00 | 0,00 | 21,88 | 0,00 | 1,00  |
| 179 | 04:20:00 | 41,00 | 1,00 |       | 0,00 | 0,00  |
| 175 | 21:20:00 | 83,00 | 1,00 | 19,68 | 0,00 | 5,00  |
| 172 | 12:38:00 | 97,00 | 1,00 |       | 1,00 | 3,00  |
| 130 | 07:55:00 | 51,00 | 1,00 |       | 0,00 | 0,00  |
| 72  | 14:59:00 | 86,00 | 0,00 | 25,95 | 1,00 | 6,00  |
| 99  | 05:18:00 | 83,00 | 1,00 |       | 0,00 |       |
| 74  | 00:38:00 | 23,00 | 0,00 | 30,42 | 1,00 | 1,00  |
| 55  | 09:19:00 | 78,00 | 0,00 | 24,91 | 0,00 | 4,00  |

|     |          |       |      |       |      |      |
|-----|----------|-------|------|-------|------|------|
| 67  | 00:10:00 | 49,00 | 1,00 | 21,89 | 0,00 | 0,00 |
| 102 | 06:24:00 | 70,00 | 0,00 |       | 0,00 | 0,00 |
| 101 | 04:51:00 | 77,00 | 0,00 | 21,79 | 0,00 | 2,00 |
| 174 | 05:11:00 | 42,00 | 1,00 |       | 0,00 | 0,00 |
| 103 | 07:04:00 | 81,00 | 1,00 | 19,98 | 0,00 | 3,00 |
| 167 | 03:22:00 | 87,00 | 1,00 | 24,89 | 1,00 | 3,00 |
| 151 | 10:20:00 | 74,00 | 0,00 | 24,21 | 0,00 | 1,00 |
| 106 | 08:34:00 | 87,00 | 0,00 | 24,15 | 0,00 | 4,00 |
| 173 | 09:05:00 | 54,00 | 1,00 |       | 0,00 | 0,00 |
| 166 | 07:12:00 | 88,00 | 0,00 | 20,02 | 1,00 | 3,00 |
| 129 | 08:32:00 | 88,00 | 1,00 | 29,75 | 0,00 | 3,00 |
| 93  | 22:18:00 | 86,00 | 0,00 |       | 1,00 | 2,00 |
| 143 | 19:51:00 | 90,00 | 1,00 | 25,59 | 0,00 | 1,00 |
| 161 | 05:30:00 | 82,00 | 1,00 | 31,04 | 0,00 | 2,00 |
| 109 | 18:43:00 | 57,00 | 0,00 |       | 0,00 | 8,00 |
| 105 | 07:28:00 | 25,00 | 1,00 | 18,59 | 0,00 | 0,00 |
| 182 | 06:17:00 | 37,00 | 0,00 |       | 0,00 | 2,00 |
| 107 | 04:45:00 | 48,00 | 1,00 |       | 0,00 | 1,00 |
| 135 | 02:49:00 | 17,00 | 0,00 |       | 0,00 | 1,00 |
| 164 | 05:30:00 | 69,00 | 0,00 |       | 0,00 | 0,00 |
| 162 | 05:34:00 | 90,00 | 1,00 | 20,96 | 0,00 | 4,00 |
| 7   | 08:11:00 | 76,00 | 0,00 |       | 0,00 | 6,00 |
| 155 | 17:40:00 | 51,00 | 1,00 | 24,61 | 0,00 | 2,00 |
| 178 | 05:08:00 | 89,00 | 1,00 | 22,98 | 0,00 | 3,00 |
| 165 | 03:29:00 | 44,00 | 0,00 |       | 0,00 |      |
| 123 | 03:17:00 | 39,00 | 0,00 |       | 0,00 | 0,00 |
| 124 | 09:16:00 | 95,00 | 1,00 |       | 0,00 | 4,00 |
| 120 | 12:21:00 | 65,00 | 1,00 |       | 0,00 | 3,00 |
| 8   | 23:29:00 | 57,00 | 0,00 |       | 0,00 | 2,00 |
| 168 | 08:10:00 | 83,00 | 0,00 | 25,62 | 0,00 | 3,00 |
| 156 | 02:11:00 | 21,00 | 0,00 |       | 0,00 | 0,00 |
| 5   | 05:14:00 | 48,00 | 0,00 | 35,92 | 0,00 | 0,00 |
| 131 | 03:56:00 | 44,00 | 0,00 |       | 0,00 | 0,00 |
| 112 | 01:08:00 | 24,00 | 0,00 |       | 0,00 | 0,00 |
| 44  | 10:32:00 | 78,00 | 0,00 | 29,40 | 0,00 |      |
| 128 | 04:03:00 | 63,00 | 0,00 |       | 0,00 | 2,00 |
| 160 | 08:12:00 | 64,00 | 0,00 | 34,31 | 0,00 | 4,00 |
| 91  | 00:41:00 | 35,00 | 1,00 | 20,76 | 0,00 | 0,00 |

| ctive_smokin | past_smoking | ntibiotic_pric | vaccin_flu | delay_symp | resp_rate | temp  | saturation |
|--------------|--------------|----------------|------------|------------|-----------|-------|------------|
| 1,00         | 1,00         | 0,00           | 2,00       | 2,00       |           | 36,00 | 96,00      |
| 0,00         | 0,00         | 0,00           | 0,00       | 5,00       |           | 37,40 | 98,00      |
| 0,00         | 0,00         | 1,00           | 0,00       | 4,00       | 15,00     | 37,00 | 96,00      |
| 0,00         | 1,00         | 1,00           | 1,00       | 7,00       | 20,00     | 37,10 | 97,00      |
| 0,00         | 0,00         | 0,00           | 0,00       | 2,00       | 19,00     | 38,00 | 94,00      |
|              |              | 0,00           |            | 3,00       |           | 38,50 | 97,00      |
| 0,00         | 2,00         | 0,00           | 2,00       | 1,00       | 32,00     | 36,40 | 94,00      |
| 0,00         | 1,00         | 1,00           | 2,00       | 1,00       |           | 37,20 | 98,00      |
| 0,00         | 1,00         | 0,00           |            | 4,00       | 36,00     | 38,50 | 93,00      |
| 0,00         | 1,00         | 1,00           | 0,00       | 3,00       | 19,00     | 37,40 | 90,00      |
| 0,00         | 0,00         | 1,00           | 2,00       | 7,00       |           | 36,40 | 95,00      |
| 0,00         | 1,00         | 0,00           | 1,00       | 15,00      |           | 37,60 | 86,00      |
| 0,00         | 0,00         | 0,00           | 0,00       | 3,00       | 20,00     | 37,10 | 97,00      |
| 0,00         | 2,00         | 0,00           | 1,00       | 1,00       | 30,00     | 37,40 | 98,00      |
| 0,00         | 0,00         | 0,00           | 0,00       | 3,00       | 18,00     | 37,50 | 95,00      |
| 0,00         | 0,00         | 0,00           | 2,00       | 10,00      |           | 36,60 | 100,00     |
| 0,00         | 1,00         | 1,00           | 1,00       | 8,00       | 16,00     | 37,00 | 95,00      |
| 0,00         | 1,00         | 1,00           | 2,00       | 7,00       | 20,00     | 37,20 | 95,00      |
| 0,00         | 0,00         | 0,00           | 0,00       | 1,00       |           | 38,20 | 99,00      |
|              |              |                |            |            |           | 38,20 | 97,00      |
| 0,00         | 0,00         | 0,00           | 0,00       | 1,00       | 0,00      | 37,10 |            |
| 1,00         | 1,00         | 1,00           | 0,00       | 3,00       | 25,00     | 37,10 | 94,00      |
| 1,00         | 0,00         | 0,00           | 1,00       | 2,00       | 25,00     | 37,10 | 97,00      |
| 1,00         | 1,00         | 0,00           |            | 15,00      |           | 36,00 | 98,00      |
| 0,00         | 0,00         | 0,00           | 2,00       | 1,00       | 30,00     | 37,10 | 88,00      |
| 1,00         | 1,00         | 0,00           | 0,00       | 1,00       | 20,00     | 37,00 | 96,00      |
| 0,00         | 0,00         | 0,00           | 0,00       | 15,00      | 20,00     | 36,80 | 94,00      |
|              |              | 0,00           |            | 1,00       |           | 39,90 | 90,00      |
|              |              |                |            | 2,00       |           | 37,50 | 98,00      |
| 0,00         | 0,00         | 0,00           | 0,00       | 15,00      |           | 37,10 | 96,00      |
| 0,00         | 0,00         | 1,00           | 1,00       | 4,00       | 38,00     | 39,20 | 92,00      |
| 1,00         | 1,00         | 0,00           |            | 15,00      |           | 37,10 | 99,00      |
| 0,00         | 0,00         | 0,00           | 0,00       | 1,00       | 14,00     | 37,80 | 99,00      |
| 1,00         | 1,00         | 0,00           |            | 1,00       |           | 37,80 | 96,00      |
|              |              | 0,00           |            | 15,00      | 30,00     | 37,70 | 92,00      |
| 0,00         | 2,00         | 0,00           | 0,00       | 3,00       | 15,00     | 37,70 | 95,00      |
|              |              | 0,00           | 1,00       | 1,00       |           | 39,20 | 97,00      |
| 0,00         | 0,00         | 0,00           | 0,00       | 15,00      | 9,00      | 36,40 | 94,00      |
| 0,00         | 1,00         | 1,00           | 2,00       | 7,00       | 20,00     | 36,90 | 97,00      |
| 0,00         | 0,00         | 0,00           | 0,00       | 1,00       | 12,00     | 38,50 | 100,00     |
| 0,00         | 0,00         |                | 0,00       | 5,00       | 30,00     | 36,70 | 100,00     |
|              |              |                |            | 1,00       |           | 39,00 | 92,00      |
| 0,00         | 0,00         | 1,00           | 1,00       | 5,00       | 27,00     | 37,90 | 95,00      |
| 1,00         | 1,00         | 0,00           | 0,00       | 2,00       |           | 39,40 |            |
|              |              |                |            | 2,00       |           | 39,60 | 98,00      |
| 0,00         | 0,00         | 0,00           | 0,00       | 10,00      | 15,00     | 37,50 | 98,00      |
| 0,00         | 0,00         | 0,00           |            | 2,00       |           | 39,20 | 97,00      |
|              |              | 0,00           |            | 1,00       |           | 38,40 | 98,00      |
|              |              | 0,00           |            | 1,00       |           | 37,00 | 93,00      |

|      |      |      |      |       |       |       |        |
|------|------|------|------|-------|-------|-------|--------|
|      | 1,00 | 0,00 |      | 1,00  |       | 36,90 | 95,00  |
| 1,00 | 1,00 | 0,00 | 2,00 | 1,00  | 30,00 | 37,00 | 99,00  |
| 2,00 | 2,00 | 0,00 | 2,00 | 3,00  | 20,00 | 36,90 | 98,00  |
| 0,00 | 0,00 | 1,00 |      | 14,00 | 30,00 | 38,50 | 96,00  |
|      |      |      |      | 4,00  |       | 37,20 | 96,00  |
|      |      | 0,00 |      | 7,00  | 30,00 | 37,90 | 95,00  |
| 1,00 | 1,00 | 0,00 | 2,00 | 7,00  | 16,00 | 37,20 | 95,00  |
| 0,00 | 0,00 | 1,00 | 1,00 | 15,00 | 38,00 | 39,00 | 80,00  |
| 0,00 | 1,00 | 0,00 |      | 7,00  |       | 36,80 | 93,00  |
| 0,00 | 0,00 | 0,00 | 0,00 | 5,00  | 17,00 | 38,50 | 98,00  |
|      |      | 1,00 |      |       |       | 36,60 | 90,00  |
| 1,00 | 1,00 | 0,00 | 0,00 | 10,00 | 12,00 | 37,30 | 99,00  |
| 0,00 | 0,00 | 0,00 | 0,00 | 1,00  |       | 38,10 | 100,00 |
| 0,00 | 1,00 | 1,00 |      | 5,00  |       | 37,40 | 95,00  |
| 0,00 | 1,00 | 0,00 |      | 2,00  |       | 36,60 | 96,00  |
|      |      | 0,00 | 1,00 | 2,00  |       | 37,30 | 97,00  |
|      |      |      |      | 5,00  |       | 38,10 | 99,00  |
|      |      |      |      | 2,00  |       | 37,00 | 96,00  |
| 1,00 | 0,00 |      | 1,00 | 15,00 |       |       |        |
| 0,00 | 0,00 | 0,00 | 1,00 | 7,00  | 15,00 | 36,70 | 100,00 |
| 0,00 | 0,00 | 0,00 | 2,00 | 2,00  | 26,00 | 36,90 | 94,00  |
| 0,00 | 0,00 | 0,00 | 0,00 | 8,00  | 32,00 | 38,40 | 94,00  |
| 0,00 | 0,00 | 0,00 | 0,00 | 3,00  | 32,00 | 38,40 | 92,00  |
| 0,00 | 0,00 | 1,00 | 2,00 | 2,00  | 36,00 | 37,80 | 94,00  |
| 0,00 | 1,00 | 0,00 | 1,00 | 1,00  | 32,00 | 38,40 | 93,00  |
| 0,00 | 0,00 | 0,00 | 0,00 | 8,00  | 20,00 | 37,00 | 98,00  |
| 1,00 | 1,00 | 0,00 | 0,00 | 6,00  | 25,00 | 36,90 | 97,00  |
| 2,00 | 2,00 | 1,00 | 2,00 | 3,00  | 29,00 | 36,60 | 93,00  |
| 0,00 | 0,00 | 0,00 | 0,00 | 1,00  | 15,00 | 38,20 | 79,00  |
| 0,00 | 0,00 | 1,00 | 2,00 | 11,00 |       | 38,40 | 95,00  |
| 0,00 | 1,00 | 1,00 | 0,00 | 8,00  | 15,00 | 37,60 | 97,00  |
| 1,00 | 1,00 | 0,00 | 2,00 | 1,00  | 15,00 | 37,80 | 96,00  |
| 0,00 | 0,00 | 0,00 | 0,00 | 15,00 |       | 38,90 | 94,00  |
| 0,00 | 0,00 | 0,00 | 0,00 | 1,00  |       | 39,20 | 91,00  |
|      |      | 0,00 |      |       |       | 37,50 | 96,00  |
|      |      | 0,00 |      |       |       | 38,30 | 93,00  |
| 0,00 | 1,00 | 0,00 |      | 1,00  |       | 37,30 | 94,00  |
| 1,00 | 1,00 | 0,00 | 0,00 | 3,00  |       | 37,80 | 96,00  |
| 0,00 | 2,00 | 0,00 | 0,00 | 2,00  |       | 37,40 | 96,00  |
| 0,00 | 1,00 | 0,00 | 1,00 | 3,00  | 33,00 | 36,00 | 92,00  |
| 0,00 | 1,00 | 0,00 | 1,00 | 7,00  | 17,00 | 36,80 | 93,00  |
| 1,00 | 1,00 | 0,00 | 0,00 | 1,00  |       | 39,40 | 98,00  |
|      |      |      |      | 3,00  |       | 39,20 | 96,00  |
| 0,00 | 2,00 | 1,00 | 2,00 | 10,00 | 30,00 | 36,10 | 91,00  |
| 0,00 | 0,00 | 1,00 | 1,00 | 12,00 | 30,00 | 37,00 | 97,00  |
| 0,00 | 0,00 | 1,00 | 1,00 | 5,00  | 24,00 | 38,80 | 87,00  |
| 2,00 | 2,00 | 2,00 | 1,00 | 1,00  |       | 38,80 | 93,00  |
| 0,00 | 0,00 | 0,00 | 0,00 | 4,00  |       | 35,60 | 95,00  |
| 1,00 | 1,00 | 0,00 |      | 1,00  |       | 36,60 | 96,00  |
| 0,00 | 1,00 | 0,00 | 1,00 | 3,00  | 35,00 | 37,00 | 95,00  |

|      |      |      |      |       |       |       |        |
|------|------|------|------|-------|-------|-------|--------|
| 0,00 | 0,00 | 0,00 | 0,00 |       | 20,00 | 36,90 | 95,00  |
| 1,00 | 1,00 | 0,00 | 0,00 | 4,00  | 26,00 | 37,70 | 91,00  |
| 0,00 | 1,00 | 1,00 | 1,00 | 2,00  | 22,00 | 36,90 | 93,00  |
| 0,00 | 0,00 | 0,00 | 2,00 | 1,00  | 26,00 | 38,60 | 92,00  |
|      |      |      |      | 1,00  | 25,00 | 36,40 | 95,00  |
| 0,00 | 1,00 | 0,00 | 2,00 | 1,00  | 26,00 | 37,40 | 89,00  |
| 0,00 | 1,00 | 0,00 | 2,00 | 2,00  |       | 37,50 | 98,00  |
|      |      |      |      | 1,00  | 20,00 | 38,60 | 98,00  |
| 1,00 | 1,00 | 0,00 | 0,00 | 2,00  |       | 37,20 | 99,00  |
| 0,00 | 1,00 | 0,00 | 0,00 | 3,00  | 24,00 | 40,00 | 92,00  |
| 0,00 | 0,00 | 1,00 | 0,00 | 3,00  | 25,00 | 38,90 | 87,00  |
| 0,00 | 0,00 | 0,00 | 2,00 | 1,00  | 32,00 | 36,50 | 87,00  |
| 0,00 | 1,00 | 0,00 | 1,00 | 1,00  | 30,00 | 39,10 | 99,00  |
| 0,00 | 0,00 | 0,00 | 0,00 | 7,00  | 29,00 | 38,50 | 95,00  |
| 1,00 | 0,00 | 0,00 |      | 10,00 |       | 38,40 | 97,00  |
| 0,00 | 1,00 | 0,00 | 0,00 | 2,00  | 15,00 | 39,10 | 98,00  |
| 0,00 | 0,00 | 1,00 | 0,00 | 10,00 | 28,00 | 36,90 | 96,00  |
|      |      |      |      | 15,00 |       | 36,60 | 97,00  |
| 0,00 | 0,00 | 0,00 | 0,00 | 1,00  | 15,00 | 38,00 | 96,00  |
| 0,00 | 2,00 | 0,00 | 2,00 | 2,00  |       | 39,10 | 95,00  |
|      |      | 1,00 |      | 5,00  | 18,00 | 37,10 | 99,00  |
| 0,00 | 0,00 | 0,00 | 0,00 | 1,00  |       | 39,10 | 98,00  |
| 0,00 |      | 0,00 |      |       |       | 36,60 | 98,00  |
| 0,00 | 0,00 | 1,00 |      | 3,00  |       | 36,90 | 99,00  |
|      |      |      |      | 10,00 |       | 37,60 | 77,00  |
| 0,00 | 0,00 | 0,00 |      |       |       | 37,50 | 95,00  |
| 0,00 | 0,00 | 0,00 |      | 1,00  |       | 39,00 | 98,00  |
|      |      | 0,00 |      | 7,00  |       | 37,60 | 96,00  |
| 1,00 | 1,00 | 0,00 | 1,00 |       | 38,00 | 35,70 | 94,00  |
| 2,00 | 2,00 | 0,00 | 0,00 | 2,00  |       | 39,50 | 96,00  |
|      |      | 1,00 |      | 2,00  |       | 35,90 | 94,00  |
| 0,00 | 0,00 | 0,00 | 0,00 | 10,00 | 12,00 | 37,10 | 99,00  |
| 0,00 | 0,00 | 0,00 | 0,00 | 10,00 | 15,00 | 36,60 | 100,00 |
| 0,00 | 0,00 | 1,00 | 0,00 | 8,00  | 15,00 | 37,20 | 100,00 |
|      |      | 0,00 |      | 1,00  |       | 38,50 | 96,00  |
| 0,00 | 2,00 | 1,00 | 0,00 | 10,00 | 22,00 | 36,10 | 93,00  |
| 0,00 |      | 0,00 |      | 1,00  |       | 37,30 | 99,00  |
| 0,00 | 1,00 | 0,00 | 1,00 | 1,00  |       | 38,30 | 97,00  |
| 0,00 | 1,00 | 0,00 | 0,00 | 2,00  | 17,00 | 38,90 | 100,00 |
| 0,00 | 1,00 | 2,00 | 2,00 | 1,00  |       | 36,90 | 99,00  |
|      |      | 0,00 | 0,00 | 1,00  | 24,00 | 37,90 | 97,00  |
| 0,00 | 1,00 | 0,00 |      |       |       | 37,30 | 97,00  |
| 1,00 | 0,00 | 0,00 |      | 15,00 |       | 36,40 | 99,00  |
|      |      |      |      |       |       | 36,70 | 92,00  |
|      |      |      |      |       |       | 37,40 | 82,00  |
|      |      | 0,00 |      | 2,00  |       | 38,10 | 100,00 |
| 0,00 | 1,00 | 0,00 | 1,00 | 2,00  | 20,00 | 38,00 | 90,00  |
| 0,00 | 2,00 | 1,00 | 1,00 | 8,00  | 30,00 | 35,70 | 95,00  |
| 0,00 | 1,00 | 0,00 | 0,00 | 1,00  | 18,00 | 38,20 | 100,00 |
| 0,00 | 2,00 | 0,00 | 2,00 | 8,00  | 26,00 | 37,00 | 98,00  |

|      |      |      |      |       |       |       |        |
|------|------|------|------|-------|-------|-------|--------|
| 0,00 | 0,00 | 1,00 | 1,00 | 2,00  | 15,00 | 36,40 | 98,00  |
| 2,00 | 2,00 | 0,00 | 2,00 | 3,00  |       | 37,10 | 96,00  |
| 0,00 | 1,00 | 1,00 | 0,00 | 12,00 | 22,00 | 37,20 | 88,00  |
|      |      |      |      |       |       | 37,10 | 99,00  |
| 0,00 | 0,00 | 0,00 | 1,00 | 1,00  | 40,00 | 36,60 | 99,00  |
| 0,00 | 1,00 | 0,00 | 0,00 |       | 36,00 | 36,00 | 96,00  |
|      |      | 0,00 | 1,00 |       |       | 37,60 | 95,00  |
| 0,00 | 1,00 | 0,00 | 0,00 | 1,00  | 17,00 | 38,20 | 97,00  |
|      |      |      |      |       |       | 36,30 | 92,00  |
| 0,00 | 1,00 | 0,00 |      |       |       | 37,50 | 98,00  |
| 0,00 | 0,00 | 1,00 |      | 4,00  |       | 36,70 | 96,00  |
| 0,00 | 2,00 | 0,00 | 2,00 | 0,00  | 34,00 | 38,00 | 97,00  |
| 0,00 | 0,00 | 0,00 | 0,00 | 1,00  |       | 38,10 | 98,00  |
|      |      | 0,00 |      | 10,00 |       | 37,10 | 91,00  |
| 0,00 | 1,00 | 0,00 |      | 1,00  |       | 38,50 | 93,00  |
| 0,00 | 0,00 | 1,00 | 0,00 | 3,00  | 17,00 | 36,70 | 98,00  |
|      |      |      |      | 4,00  |       | 37,50 | 90,00  |
| 0,00 | 0,00 | 0,00 |      | 6,00  | 22,00 | 36,10 | 98,00  |
|      |      | 0,00 |      | 1,00  |       | 36,90 | 100,00 |
|      |      |      |      |       | 21,00 | 36,40 | 100,00 |
|      |      |      |      | 21,00 |       | 36,70 | 92,00  |
| 0,00 | 1,00 | 0,00 | 1,00 | 3,00  | 20,00 | 37,70 | 96,00  |
|      |      | 0,00 |      | 3,00  |       | 37,00 | 97,00  |
| 0,00 | 1,00 | 0,00 |      |       | 20,00 | 37,90 | 92,00  |
|      |      |      |      |       |       | 37,80 | 93,00  |
|      |      | 0,00 |      | 5,00  |       | 38,20 | 96,00  |
|      |      | 0,00 |      | 1,00  | 24,00 | 37,30 | 92,00  |
| 0,00 | 1,00 | 0,00 |      | 1,00  |       | 38,90 | 96,00  |
|      |      | 0,00 | 0,00 | 7,00  | 20,00 | 39,70 | 84,00  |
|      |      |      |      |       | 19,00 | 39,60 | 96,00  |
| 0,00 | 0,00 | 0,00 |      | 2,00  |       | 38,70 | 97,00  |
| 1,00 | 1,00 | 0,00 | 0,00 | 4,00  | 15,00 | 38,60 | 93,00  |
|      |      |      |      |       | 16,00 | 38,60 | 95,00  |
|      |      | 0,00 |      |       |       | 37,60 | 99,00  |
|      | 1,00 | 0,00 | 1,00 | 1,00  | 38,00 | 38,10 | 100,00 |
| 0,00 | 1,00 | 0,00 | 0,00 | 2,00  | 37,00 | 38,90 | 93,00  |
|      |      | 1,00 | 1,00 | 3,00  |       | 37,10 | 97,00  |
| 0,00 | 0,00 | 0,00 | 0,00 | 3,00  | 15,00 | 37,00 | 100,00 |



| oxygene | heart_rate | stolic_pressu | glasgow | fluA | fluB | RSV  | lab_fluA |
|---------|------------|---------------|---------|------|------|------|----------|
| 0,00    | 80,00      | 100,00        | 15,00   | 1,00 | 0,00 | 0,00 | 1,00     |
| 0,00    | 97,00      | 159,00        | 15,00   | 0,00 | 0,00 | 0,00 | 0,00     |
| 0,00    | 88,00      | 116,00        | 15,00   | 0,00 | 1,00 | 0,00 | 0,00     |
| 0,00    | 74,00      | 88,00         | 15,00   | 0,00 | 1,00 | 0,00 | 0,00     |
| 0,00    | 112,00     | 131,00        | 15,00   | 0,00 | 0,00 | 0,00 | 0,00     |
| 0,00    | 83,00      | 176,00        | 15,00   | 0,00 | 0,00 | 0,00 | 0,00     |
| 0,00    | 56,00      | 151,00        | 15,00   | 0,00 | 0,00 | 1,00 | 0,00     |
| 0,00    | 116,00     | 155,00        | 15,00   | 0,00 | 0,00 | 0,00 | 0,00     |
| 9,00    | 81,00      | 146,00        | 15,00   | 0,00 | 0,00 | 0,00 | 0,00     |
| 4,00    | 68,00      | 98,00         | 15,00   | 0,00 | 1,00 | 0,00 | 0,00     |
| 0,00    | 72,00      | 152,00        | 15,00   | 0,00 | 0,00 | 0,00 | 0,00     |
| 5,00    | 72,00      | 172,00        | 15,00   | 0,00 | 1,00 | 0,00 | 0,00     |
| 0,00    | 86,00      | 137,00        | 15,00   | 0,00 | 1,00 | 0,00 | 0,00     |
| 0,00    | 96,00      | 149,00        | 15,00   | 0,00 | 0,00 | 0,00 | 0,00     |
| 0,00    | 57,00      | 203,00        | 15,00   | 0,00 | 0,00 | 0,00 | 0,00     |
| 0,00    | 94,00      | 129,00        | 15,00   | 0,00 | 0,00 | 0,00 | 0,00     |
| 0,00    | 86,00      | 114,00        | 15,00   | 0,00 | 0,00 | 0,00 | 0,00     |
| 0,00    | 96,00      | 177,00        | 15,00   | 0,00 | 0,00 | 0,00 | 0,00     |
| 0,00    | 91,00      | 140,00        | 15,00   | 0,00 | 0,00 | 0,00 | 0,00     |
| 0,00    | 118,00     | 156,00        | 15,00   | 0,00 | 1,00 | 0,00 | 0,00     |
| 0,00    | 135,00     | 70,00         | 15,00   | 1,00 | 0,00 | 0,00 | 0,00     |
| 2,00    | 102,00     | 146,00        | 15,00   | 0,00 | 0,00 | 1,00 | 0,00     |
| 0,00    | 89,00      | 123,00        | 15,00   | 0,00 | 0,00 | 0,00 | 0,00     |
| 0,00    | 87,00      | 138,00        | 15,00   | 0,00 | 1,00 | 0,00 | 0,00     |
| 15,00   | 130,00     | 133,00        | 3,00    | 0,00 | 0,00 | 0,00 | 0,00     |
| 0,00    | 86,00      | 113,00        | 15,00   | 0,00 | 0,00 | 0,00 | 0,00     |
| 0,00    | 60,00      | 200,00        | 15,00   | 0,00 | 0,00 | 1,00 | 0,00     |
| 0,00    | 93,00      | 188,00        | 15,00   | 0,00 | 1,00 | 0,00 | 0,00     |
| 0,00    | 75,00      | 171,00        | 15,00   | 0,00 | 0,00 | 0,00 | 0,00     |
| 0,00    | 120,00     | 111,00        | 15,00   | 0,00 | 0,00 | 0,00 | 0,00     |
| 0,00    | 161,00     | 160,00        | 15,00   | 0,00 | 0,00 | 1,00 | 0,00     |
| 0,00    | 103,00     | 109,00        | 15,00   | 0,00 | 1,00 | 0,00 | 0,00     |
| 0,00    | 88,00      | 124,00        | 15,00   | 0,00 | 0,00 | 0,00 | 0,00     |
| 0,00    | 80,00      | 109,00        | 15,00   | 0,00 | 0,00 | 0,00 | 0,00     |
| 0,00    | 79,00      | 151,00        | 15,00   | 0,00 | 0,00 | 0,00 | 0,00     |
| 0,00    | 107,00     | 144,00        | 15,00   | 0,00 | 0,00 | 0,00 | 0,00     |
| 2,00    | 102,00     | 194,00        | 15,00   | 0,00 | 1,00 | 0,00 | 0,00     |
| 0,00    | 100,00     | 118,00        | 15,00   | 0,00 | 0,00 | 0,00 | 0,00     |
| 0,00    | 85,00      | 109,00        | 15,00   | 0,00 | 0,00 | 0,00 | 0,00     |
| 0,00    | 88,00      | 135,00        | 15,00   | 0,00 | 0,00 | 0,00 | 0,00     |
| 4,00    | 78,00      | 166,00        | 15,00   | 0,00 | 0,00 | 0,00 | 0,00     |
| 0,00    | 84,00      | 150,00        | 15,00   | 0,00 | 0,00 | 0,00 |          |
| 5,00    | 79,00      | 192,00        | 11,00   | 0,00 | 0,00 | 0,00 | 0,00     |
|         |            |               | 15,00   | 1,00 | 0,00 | 0,00 | 1,00     |
| 0,00    | 88,00      | 104,00        | 15,00   | 0,00 | 1,00 | 0,00 | 0,00     |
| 0,00    | 107,00     | 122,00        | 15,00   | 0,00 | 0,00 | 0,00 | 0,00     |
| 0,00    | 130,00     | 140,00        | 15,00   | 0,00 | 0,00 | 0,00 | 0,00     |
| 0,00    | 95,00      | 135,00        | 15,00   | 0,00 | 0,00 | 0,00 | 0,00     |
| 0,00    | 101,00     | 166,00        | 15,00   | 0,00 | 0,00 | 0,00 | 0,00     |

|      |        |        |       |      |      |      |      |
|------|--------|--------|-------|------|------|------|------|
| 0,00 | 101,00 | 124,00 | 15,00 | 0,00 | 0,00 | 0,00 | 0,00 |
| 0,00 | 78,00  | 130,00 | 15,00 | 0,00 | 0,00 | 0,00 | 0,00 |
| 0,00 | 98,00  | 187,00 | 15,00 | 0,00 | 0,00 | 0,00 | 0,00 |
| 0,00 | 64,00  | 116,00 | 15,00 | 0,00 | 1,00 | 0,00 | 0,00 |
| 0,00 | 88,00  | 183,00 | 15,00 | 0,00 | 0,00 | 0,00 | 0,00 |
| 9,00 | 84,00  | 150,00 | 15,00 | 0,00 | 0,00 | 1,00 | 0,00 |
| 0,00 | 81,00  | 113,00 | 15,00 | 0,00 | 1,00 | 0,00 | 0,00 |
| 0,00 | 190,00 | 128,00 | 15,00 | 1,00 | 0,00 | 0,00 | 1,00 |
| 0,00 | 97,00  | 121,00 | 15,00 | 0,00 | 0,00 | 1,00 | 0,00 |
| 0,00 | 95,00  | 125,00 | 15,00 | 0,00 | 1,00 | 0,00 | 0,00 |
| 0,00 | 76,00  | 179,00 | 15,00 | 1,00 | 0,00 | 0,00 | 1,00 |
| 0,00 | 96,00  | 107,00 | 15,00 | 0,00 | 0,00 | 0,00 | 1,00 |
| 0,00 | 93,00  | 134,00 | 15,00 | 1,00 | 0,00 | 0,00 | 1,00 |
| 0,00 | 89,00  | 168,00 | 15,00 | 0,00 | 1,00 | 0,00 | 0,00 |
| 0,00 | 68,00  | 154,00 | 12,00 | 0,00 | 0,00 | 1,00 | 0,00 |
| 6,00 | 109,00 | 108,00 | 11,00 | 0,00 | 1,00 | 0,00 | 0,00 |
| 9,00 | 150,00 | 121,00 | 15,00 | 0,00 | 1,00 | 0,00 | 0,00 |
| 0,00 | 96,00  | 136,00 | 15,00 | 0,00 | 0,00 | 0,00 | 0,00 |
|      |        |        | 15,00 | 0,00 | 0,00 | 1,00 | 0,00 |
| 0,00 | 98,00  | 131,00 | 15,00 | 0,00 | 0,00 | 1,00 |      |
| 2,00 | 82,00  | 116,00 | 15,00 | 0,00 | 1,00 | 0,00 | 0,00 |
| 0,00 | 138,00 | 122,00 | 15,00 | 1,00 | 0,00 | 0,00 | 1,00 |
| 0,00 | 117,00 | 159,00 | 15,00 | 1,00 | 0,00 | 0,00 | 1,00 |
| 3,00 | 113,00 | 90,00  | 15,00 | 1,00 | 0,00 | 0,00 | 0,00 |
| 3,00 | 85,00  | 166,00 | 15,00 | 0,00 | 1,00 | 0,00 | 0,00 |
| 0,00 | 98,00  | 132,00 | 15,00 | 1,00 | 0,00 | 0,00 |      |
| 0,00 | 90,00  | 139,00 | 15,00 | 0,00 | 1,00 | 0,00 | 0,00 |
| 5,00 | 97,00  | 131,00 | 15,00 | 0,00 | 1,00 | 0,00 | 0,00 |
| 0,00 | 72,00  | 140,00 | 14,00 | 0,00 | 1,00 | 0,00 | 0,00 |
| 0,00 | 96,00  | 171,00 | 15,00 | 0,00 | 0,00 | 0,00 | 0,00 |
| 0,00 | 75,00  | 156,00 | 15,00 | 0,00 | 1,00 | 0,00 | 0,00 |
| 0,00 | 104,00 | 134,00 | 15,00 | 0,00 | 0,00 | 0,00 | 0,00 |
| 2,00 | 95,00  | 146,00 | 15,00 | 0,00 | 0,00 | 0,00 | 0,00 |
| 0,00 | 110,00 | 171,00 | 15,00 | 0,00 | 0,00 | 1,00 | 0,00 |
| 2,00 | 75,00  | 91,00  | 13,00 | 0,00 | 1,00 | 0,00 | 0,00 |
| 0,00 | 120,00 | 142,00 | 15,00 | 0,00 | 0,00 | 0,00 |      |
| 6,00 | 100,00 | 111,00 | 15,00 | 0,00 | 0,00 | 0,00 | 0,00 |
| 0,00 | 75,00  | 105,00 | 15,00 | 0,00 | 1,00 | 0,00 | 0,00 |
| 0,00 | 105,00 | 124,00 | 15,00 | 0,00 | 1,00 | 0,00 | 0,00 |
| 4,00 | 113,00 | 211,00 | 15,00 | 0,00 | 0,00 | 0,00 | 0,00 |
| 0,00 | 128,00 | 185,00 | 15,00 | 0,00 | 0,00 | 0,00 | 0,00 |
| 0,00 | 92,00  | 163,00 | 15,00 | 1,00 | 0,00 | 0,00 | 0,00 |
| 3,00 | 118,00 | 168,00 | 15,00 | 0,00 | 0,00 | 1,00 | 0,00 |
| 2,00 | 95,00  | 91,00  | 15,00 | 0,00 | 0,00 | 1,00 | 0,00 |
| 3,00 | 115,00 | 135,00 | 15,00 | 0,00 | 0,00 | 0,00 | 0,00 |
| 9,00 | 115,00 | 90,00  | 14,00 | 0,00 | 0,00 | 1,00 | 0,00 |
| 0,00 | 85,00  | 215,00 | 12,00 | 0,00 | 0,00 | 0,00 | 0,00 |
| 0,00 | 74,00  | 109,00 | 15,00 | 1,00 | 0,00 | 0,00 | 1,00 |
| 0,00 | 65,00  | 141,00 | 15,00 | 0,00 | 0,00 | 0,00 | 0,00 |
| 2,00 | 100,00 | 118,00 | 15,00 | 0,00 | 0,00 | 0,00 | 0,00 |

|      |        |        |       |      |      |      |      |
|------|--------|--------|-------|------|------|------|------|
| 0,00 | 89,00  | 152,00 | 15,00 | 0,00 | 0,00 | 0,00 | 0,00 |
| 9,00 | 124,00 | 132,00 | 15,00 | 0,00 | 0,00 | 0,00 | 0,00 |
| 3,00 | 77,00  | 118,00 | 15,00 | 0,00 | 0,00 | 0,00 | 0,00 |
| 0,00 | 89,00  | 115,00 | 15,00 | 1,00 | 0,00 | 0,00 | 1,00 |
| 3,00 | 91,00  | 102,00 | 15,00 | 1,00 | 0,00 | 0,00 | 1,00 |
| 3,00 | 77,00  | 132,00 | 15,00 | 0,00 | 0,00 | 0,00 |      |
| 0,00 | 89,00  | 164,00 | 15,00 | 0,00 | 0,00 | 0,00 | 0,00 |
| 0,00 | 78,00  | 201,00 | 15,00 | 1,00 | 0,00 | 0,00 | 1,00 |
| 0,00 | 75,00  | 122,00 | 15,00 | 0,00 | 0,00 | 0,00 | 0,00 |
| 4,00 | 120,00 | 125,00 | 15,00 | 1,00 | 0,00 | 0,00 | 1,00 |
| 3,00 | 101,00 | 195,00 | 15,00 | 1,00 | 0,00 | 0,00 | 1,00 |
| 9,00 | 76,00  | 83,00  | 13,00 | 0,00 | 1,00 | 0,00 | 0,00 |
| 9,00 | 105,00 | 149,00 | 15,00 | 0,00 | 0,00 | 1,00 |      |
| 0,00 | 100,00 | 142,00 | 15,00 | 0,00 | 1,00 | 0,00 | 0,00 |
| 0,00 | 91,00  | 109,00 | 15,00 | 0,00 | 0,00 | 1,00 | 0,00 |
| 0,00 | 102,00 | 135,00 | 15,00 | 0,00 | 1,00 | 0,00 | 0,00 |
| 0,00 |        | 147,00 | 15,00 | 0,00 | 0,00 | 1,00 | 0,00 |
| 0,00 | 74,00  | 124,00 | 15,00 | 0,00 | 0,00 | 0,00 | 0,00 |
| 0,00 | 98,00  | 112,00 | 15,00 | 0,00 | 0,00 | 0,00 | 0,00 |
| 0,00 | 108,00 | 148,00 | 15,00 | 1,00 | 0,00 | 0,00 |      |
| 0,00 | 96,00  | 127,00 | 15,00 | 0,00 | 0,00 | 0,00 | 0,00 |
| 0,00 | 101,00 | 144,00 | 15,00 | 1,00 | 0,00 | 0,00 | 1,00 |
| 0,00 | 64,00  | 124,00 | 15,00 | 0,00 | 0,00 | 0,00 | 0,00 |
| 0,00 | 97,00  | 149,00 | 15,00 | 1,00 | 0,00 | 0,00 | 1,00 |
| 0,00 | 100,00 | 126,00 | 15,00 | 0,00 | 0,00 | 1,00 | 0,00 |
| 0,00 | 71,00  | 121,00 | 15,00 | 0,00 | 0,00 | 0,00 | 0,00 |
| 2,00 | 164,00 | 166,00 | 15,00 | 0,00 | 0,00 | 0,00 | 0,00 |
| 0,00 | 74,00  | 147,00 | 15,00 | 0,00 | 1,00 | 0,00 | 0,00 |
| 0,00 | 90,00  | 162,00 | 15,00 | 0,00 | 0,00 | 0,00 | 0,00 |
| 0,00 | 112,00 | 152,00 | 15,00 | 1,00 | 0,00 | 0,00 | 1,00 |
| 0,00 | 89,00  | 157,00 | 15,00 | 0,00 | 1,00 | 0,00 | 0,00 |
| 0,00 | 86,00  | 166,00 | 15,00 | 0,00 | 0,00 | 0,00 | 0,00 |
| 0,00 | 76,00  | 136,00 | 15,00 | 0,00 | 0,00 | 1,00 | 0,00 |
| 0,00 | 86,00  | 126,00 | 15,00 | 0,00 | 0,00 | 1,00 | 0,00 |
| 0,00 | 78,00  | 155,00 | 15,00 | 0,00 | 1,00 | 0,00 | 0,00 |
| 0,00 | 82,00  | 160,00 | 15,00 | 0,00 | 0,00 | 0,00 | 0,00 |
| 0,00 | 71,00  | 125,00 | 15,00 | 0,00 | 0,00 | 0,00 | 0,00 |
| 0,00 | 98,00  | 155,00 | 15,00 | 0,00 | 0,00 | 0,00 | 0,00 |
| 0,00 | 107,00 | 112,00 | 15,00 | 0,00 | 0,00 | 0,00 | 0,00 |
| 0,00 | 86,00  | 137,00 | 15,00 | 0,00 | 1,00 | 0,00 | 0,00 |
| 3,00 | 102,00 | 154,00 | 15,00 | 0,00 | 0,00 | 1,00 | 0,00 |
| 0,00 | 69,00  | 125,00 | 15,00 | 0,00 | 0,00 | 0,00 | 0,00 |
| 0,00 | 111,00 | 129,00 | 15,00 | 0,00 | 0,00 | 0,00 | 0,00 |
| 0,00 | 86,00  | 145,00 | 15,00 | 0,00 | 0,00 | 1,00 | 0,00 |
| 0,00 | 85,00  | 155,00 | 15,00 | 0,00 | 1,00 | 0,00 | 0,00 |
| 0,00 | 70,00  | 108,00 | 15,00 | 0,00 | 1,00 | 0,00 | 0,00 |
| 4,00 | 94,00  | 103,00 | 15,00 | 0,00 | 0,00 | 0,00 | 0,00 |
| 0,00 | 115,00 | 114,00 | 15,00 | 0,00 | 0,00 | 1,00 | 0,00 |
| 0,00 | 125,00 | 165,00 | 15,00 | 1,00 | 0,00 | 0,00 | 1,00 |
| 9,00 | 84,00  | 135,00 | 15,00 | 0,00 | 0,00 | 0,00 | 0,00 |

|      |        |        |       |      |      |      |      |
|------|--------|--------|-------|------|------|------|------|
| 0,00 | 109,00 | 106,00 | 15,00 | 0,00 | 1,00 | 0,00 |      |
| 0,00 | 100,00 | 136,00 | 15,00 | 0,00 | 0,00 | 0,00 | 0,00 |
| 0,00 | 75,00  | 165,00 | 15,00 | 0,00 | 1,00 | 0,00 | 0,00 |
| 0,00 | 69,00  | 126,00 | 15,00 | 0,00 | 0,00 | 0,00 | 0,00 |
| 2,00 | 101,00 | 119,00 | 15,00 | 0,00 | 0,00 | 0,00 | 0,00 |
| 0,00 | 84,00  | 148,00 | 15,00 | 0,00 | 0,00 | 0,00 | 0,00 |
| 0,00 | 101,00 | 121,00 | 15,00 | 0,00 | 0,00 | 0,00 | 0,00 |
| 0,00 | 104,00 | 95,00  | 15,00 | 1,00 | 0,00 | 0,00 | 1,00 |
| 0,00 | 122,00 | 131,00 | 15,00 | 0,00 | 0,00 | 0,00 | 0,00 |
| 0,00 | 82,00  | 118,00 | 15,00 | 1,00 | 0,00 | 0,00 | 1,00 |
| 0,00 | 66,00  | 171,00 | 15,00 | 0,00 | 0,00 | 0,00 | 0,00 |
| 0,00 | 73,00  | 99,00  | 15,00 | 0,00 | 0,00 | 0,00 | 0,00 |
| 0,00 | 74,00  | 160,00 | 15,00 | 0,00 | 0,00 | 0,00 | 0,00 |
| 0,00 | 81,00  | 174,00 | 15,00 | 0,00 | 1,00 | 0,00 | 0,00 |
| 0,00 | 100,00 | 109,00 | 15,00 | 0,00 | 0,00 | 0,00 | 0,00 |
| 0,00 | 134,00 | 115,00 | 15,00 | 0,00 | 0,00 | 0,00 | 0,00 |
| 5,00 | 76,00  | 114,00 | 15,00 | 0,00 | 0,00 | 0,00 | 0,00 |
| 0,00 | 87,00  | 104,00 | 15,00 | 0,00 | 0,00 | 0,00 | 0,00 |
| 0,00 | 94,00  | 123,00 | 15,00 | 0,00 | 0,00 | 0,00 | 0,00 |
| 4,00 |        | 171,00 | 15,00 | 0,00 | 0,00 | 0,00 | 0,00 |
| 0,00 | 73,00  | 148,00 | 15,00 | 0,00 | 0,00 | 0,00 |      |
| 0,00 | 86,00  | 194,00 | 15,00 | 0,00 | 1,00 | 0,00 | 0,00 |
| 0,00 | 95,00  | 174,00 | 15,00 | 0,00 | 0,00 | 0,00 | 0,00 |
| 4,00 | 66,00  | 186,00 | 15,00 | 0,00 | 0,00 | 1,00 | 0,00 |
| 0,00 | 98,00  | 169,00 | 15,00 | 0,00 | 1,00 | 0,00 |      |
| 0,00 | 84,00  | 138,00 | 15,00 | 0,00 | 1,00 | 0,00 | 0,00 |
| 4,00 | 90,00  | 167,00 | 15,00 | 0,00 | 0,00 | 0,00 | 0,00 |
| 0,00 | 98,00  | 144,00 | 15,00 | 0,00 | 0,00 | 0,00 | 0,00 |
| 0,00 | 101,00 | 106,00 | 15,00 | 1,00 | 0,00 | 0,00 | 1,00 |
| 0,00 | 127,00 | 109,00 | 15,00 | 0,00 | 0,00 | 1,00 |      |
| 0,00 | 96,00  | 115,00 | 15,00 | 1,00 | 0,00 | 0,00 | 1,00 |
| 0,00 | 76,00  | 131,00 | 15,00 | 0,00 | 1,00 | 0,00 | 0,00 |
| 0,00 | 103,00 | 136,00 | 15,00 | 0,00 | 1,00 | 0,00 |      |
| 0,00 | 69,00  | 117,00 | 15,00 | 0,00 | 0,00 | 0,00 |      |
| 9,00 | 93,00  | 165,00 | 15,00 | 1,00 | 0,00 | 0,00 | 1,00 |
| 2,00 | 126,00 | 138,00 | 15,00 | 0,00 | 0,00 | 1,00 | 0,00 |
| 0,00 | 70,00  | 113,00 | 15,00 | 0,00 | 0,00 | 0,00 | 0,00 |
| 0,00 | 77,00  | 126,00 | 15,00 | 0,00 | 0,00 | 0,00 | 0,00 |

| lab_fluB | discharged | lenght_hosp | death | _patient_e | n_admission |
|----------|------------|-------------|-------|------------|-------------|
| 0,00     | 1,00       |             | 0,00  | 68,00      | 8,00        |
| 0,00     | 1,00       |             | 0,00  | 70,00      | 8,00        |
| 1,00     | 1,00       |             | 0,00  | 61,00      | 9,00        |
| 1,00     | 0,00       | 9,00        | 0,00  | 57,00      | 9,00        |
| 0,00     | 1,00       |             | 0,00  | 49,00      | 9,00        |
| 0,00     | 0,00       | 13,00       | 0,00  | 64,00      | 9,00        |
| 0,00     | 1,00       |             | 0,00  | 45,00      | 10,00       |
| 0,00     | 1,00       |             | 0,00  | 59,00      | 7,00        |
| 0,00     | 0,00       | 15,00       | 0,00  | 53,00      | 9,00        |
| 1,00     | 0,00       | 7,00        | 0,00  | 52,00      | 9,00        |
| 0,00     | 1,00       |             | 0,00  |            | 13,00       |
| 1,00     | 0,00       | 5,00        | 0,00  | 54,00      | 7,00        |
| 1,00     | 0,00       | 15,00       | 0,00  | 52,00      | 7,00        |
| 0,00     | 0,00       | 6,00        | 1,00  | 61,00      | 7,00        |
| 0,00     | 1,00       |             | 0,00  | 63,00      | 7,00        |
| 0,00     | 1,00       |             | 0,00  | 60,00      | 7,00        |
| 0,00     | 0,00       | 5,00        | 0,00  | 55,00      | 7,00        |
| 0,00     | 1,00       |             | 0,00  | 60,00      | 8,00        |
| 0,00     | 1,00       |             | 0,00  | 45,00      | 11,00       |
| 1,00     | 1,00       |             | 0,00  | 45,00      | 8,00        |
| 0,00     | 1,00       |             | 0,00  | 27,00      | 4,00        |
| 0,00     | 0,00       | 5,00        | 0,00  | 43,00      | 4,00        |
| 0,00     | 0,00       | 3,00        | 0,00  | 44,00      | 6,00        |
| 1,00     | 1,00       |             | 0,00  | 31,00      | 6,00        |
| 0,00     | 0,00       | 4,00        | 1,00  | 43,00      | 12,00       |
| 0,00     | 1,00       |             | 0,00  | 30,00      | 12,00       |
| 0,00     | 1,00       |             | 0,00  | 43,00      | 12,00       |
| 1,00     | 1,00       |             | 0,00  | 38,00      | 10,00       |
| 0,00     | 1,00       |             | 0,00  | 36,00      | 10,00       |
| 0,00     | 1,00       |             | 0,00  | 36,00      | 10,00       |
| 0,00     | 0,00       | 5,00        | 0,00  | 36,00      | 11,00       |
| 1,00     | 1,00       |             | 0,00  | 39,00      | 11,00       |
| 0,00     | 1,00       |             | 0,00  | 53,00      | 11,00       |
| 0,00     | 1,00       |             | 0,00  | 44,00      | 11,00       |
| 0,00     | 0,00       | 1,00        | 0,00  | 45,00      | 6,00        |
| 0,00     | 1,00       |             | 0,00  |            | 7,00        |
| 1,00     | 0,00       | 8,00        | 0,00  | 47,00      | 7,00        |
| 0,00     | 0,00       | 4,00        | 0,00  | 44,00      | 8,00        |
| 0,00     | 0,00       | 11,00       | 0,00  |            | 10,00       |
| 0,00     | 1,00       |             | 0,00  | 60,00      | 11,00       |
| 0,00     | 0,00       | 3,00        | 0,00  | 44,00      | 11,00       |
|          | 1,00       |             | 0,00  | 45,00      | 11,00       |
| 0,00     | 0,00       | 8,00        | 1,00  | 75,00      | 9,00        |
| 0,00     | 1,00       |             | 0,00  | 39,00      | 11,00       |
| 1,00     | 1,00       |             | 0,00  | 49,00      | 11,00       |
| 0,00     | 1,00       |             | 0,00  | 25,00      | 7,00        |
| 0,00     | 1,00       |             | 0,00  | 16,00      | 7,00        |
| 0,00     | 1,00       |             | 0,00  | 18,00      | 7,00        |
| 0,00     | 0,00       | 4,00        | 0,00  | 18,00      | 7,00        |

|      |      |       |      |       |       |
|------|------|-------|------|-------|-------|
| 0,00 | 1,00 |       | 0,00 | 18,00 | 7,00  |
| 0,00 | 0,00 | 2,00  | 0,00 | 62,00 | 2,00  |
| 0,00 | 0,00 | 4,00  | 0,00 | 62,00 | 11,00 |
| 1,00 | 1,00 |       | 0,00 | 29,00 | 11,00 |
| 0,00 | 1,00 |       | 0,00 | 26,00 | 5,00  |
| 0,00 | 0,00 | 1,00  | 1,00 | 28,00 | 5,00  |
| 1,00 | 1,00 |       | 0,00 | 66,00 | 12,00 |
| 0,00 | 0,00 | 23,00 | 0,00 | 45,00 | 11,00 |
| 0,00 | 0,00 | 5,00  | 0,00 | 37,00 | 10,00 |
| 1,00 | 1,00 |       | 0,00 | 68,00 | 17,00 |
| 0,00 | 0,00 | 16,00 | 0,00 | 56,00 | 10,00 |
| 0,00 | 1,00 |       | 0,00 |       | 10,00 |
| 0,00 | 1,00 |       | 0,00 |       | 5,00  |
| 1,00 | 1,00 |       | 0,00 | 47,00 | 4,00  |
| 0,00 | 1,00 |       | 0,00 | 46,00 | 2,00  |
| 1,00 | 0,00 | 3,00  | 0,00 | 55,00 | 7,00  |
| 1,00 | 0,00 | 8,00  | 0,00 | 55,00 | 12,00 |
| 0,00 | 1,00 |       | 0,00 | 59,00 | 12,00 |
| 0,00 | 1,00 |       | 0,00 | 59,00 | 12,00 |
|      | 1,00 |       | 0,00 | 46,00 | 10,00 |
| 1,00 | 0,00 | 9,00  | 0,00 | 63,00 | 10,00 |
| 0,00 | 0,00 | 4,00  | 0,00 | 55,00 | 11,00 |
| 0,00 | 1,00 |       | 0,00 | 31,00 | 7,00  |
| 0,00 | 1,00 |       | 0,00 | 36,00 | 4,00  |
| 1,00 | 1,00 |       | 0,00 | 60,00 | 2,00  |
| 0,00 | 1,00 |       | 0,00 | 46,00 | 6,00  |
| 1,00 | 1,00 |       | 0,00 | 67,00 | 12,00 |
| 1,00 | 0,00 | 3,00  | 1,00 | 60,00 | 12,00 |
| 1,00 | 0,00 | 4,00  | 0,00 | 53,00 | 12,00 |
| 0,00 | 1,00 |       | 0,00 |       | 12,00 |
| 1,00 | 1,00 |       | 0,00 | 71,00 | 10,00 |
| 0,00 | 1,00 |       | 0,00 | 57,00 | 12,00 |
| 0,00 | 1,00 |       | 0,00 | 69,00 | 16,00 |
| 0,00 | 0,00 | 9,00  | 0,00 | 59,00 | 12,00 |
| 1,00 | 0,00 | 12,00 | 1,00 | 58,00 | 5,00  |
|      | 1,00 |       | 0,00 | 61,00 | 3,00  |
| 0,00 | 0,00 | 38,00 | 0,00 | 52,00 | 3,00  |
| 1,00 | 1,00 |       | 0,00 |       | 9,00  |
| 1,00 | 1,00 |       | 0,00 |       | 10,00 |
| 0,00 | 0,00 | 4,00  | 1,00 | 74,00 | 11,00 |
| 0,00 | 0,00 | 7,00  | 0,00 | 76,00 | 10,00 |
| 0,00 | 1,00 |       | 0,00 | 75,00 | 10,00 |
| 0,00 | 0,00 | 7,00  | 0,00 | 61,00 | 14,00 |
| 0,00 | 0,00 | 27,00 | 0,00 |       | 5,00  |
| 0,00 | 0,00 | 7,00  | 0,00 | 71,00 | 13,00 |
| 0,00 | 0,00 | 6,00  | 1,00 | 52,00 | 12,00 |
| 0,00 | 0,00 | 14,00 | 0,00 |       | 12,00 |
| 0,00 | 0,00 | 3,00  | 0,00 | 74,00 | 12,00 |
| 0,00 | 1,00 |       | 0,00 | 78,00 | 12,00 |
| 0,00 | 1,00 |       | 0,00 | 58,00 | 12,00 |

|      |      |       |      |       |       |
|------|------|-------|------|-------|-------|
| 0,00 | 1,00 |       | 0,00 |       | 10,00 |
| 0,00 | 0,00 | 7,00  | 0,00 | 58,00 | 10,00 |
| 0,00 | 0,00 | 3,00  | 0,00 |       | 10,00 |
| 0,00 | 1,00 |       | 0,00 | 46,00 | 12,00 |
| 0,00 | 0,00 | 11,00 | 0,00 |       | 12,00 |
|      | 0,00 | 6,00  | 0,00 | 84,00 | 8,00  |
| 0,00 | 0,00 | 15,00 | 0,00 |       | 8,00  |
| 0,00 | 1,00 |       | 0,00 |       | 8,00  |
| 0,00 | 1,00 |       | 0,00 |       | 5,00  |
| 0,00 | 0,00 | 3,00  | 0,00 |       | 6,00  |
| 0,00 | 0,00 | 2,00  | 0,00 | 42,00 | 2,00  |
| 1,00 | 0,00 | 0,00  | 1,00 |       | 2,00  |
|      | 0,00 | 2,00  | 0,00 |       | 4,00  |
| 1,00 | 1,00 |       | 0,00 | 43,00 | 2,00  |
| 0,00 | 0,00 | 15,00 | 0,00 | 52,00 | 10,00 |
| 1,00 | 0,00 | 7,00  | 0,00 | 66,00 | 10,00 |
| 0,00 | 1,00 |       | 0,00 | 70,00 | 10,00 |
| 0,00 | 1,00 |       | 0,00 | 55,00 | 9,00  |
| 0,00 | 1,00 |       | 0,00 | 66,00 | 9,00  |
|      | 1,00 |       | 0,00 | 57,00 | 7,00  |
| 0,00 | 1,00 |       | 0,00 | 64,00 | 9,00  |
| 0,00 | 1,00 |       | 0,00 | 70,00 | 12,00 |
| 0,00 | 0,00 | 8,00  | 0,00 | 62,00 | 12,00 |
| 0,00 | 1,00 |       | 0,00 | 64,00 | 12,00 |
| 0,00 | 0,00 | 24,00 | 0,00 | 64,00 | 12,00 |
| 0,00 | 1,00 |       | 0,00 | 44,00 | 6,00  |
| 0,00 | 0,00 | 2,00  | 0,00 | 30,00 | 8,00  |
| 1,00 | 1,00 |       | 0,00 | 28,00 | 2,00  |
| 0,00 | 0,00 | 1,00  | 0,00 | 30,00 | 4,00  |
| 0,00 | 1,00 |       | 0,00 | 32,00 | 4,00  |
| 1,00 | 1,00 |       | 0,00 | 34,00 | 10,00 |
| 0,00 | 0,00 | 13,00 | 0,00 | 64,00 | 10,00 |
| 0,00 | 1,00 |       | 0,00 | 50,00 | 10,00 |
| 0,00 | 1,00 |       | 0,00 | 48,00 | 6,00  |
| 1,00 | 1,00 |       | 0,00 | 47,00 | 6,00  |
| 0,00 | 1,00 |       | 0,00 | 64,00 | 6,00  |
| 0,00 | 0,00 | 6,00  | 0,00 | 48,00 | 6,00  |
| 0,00 | 1,00 |       | 0,00 | 53,00 | 10,00 |
| 0,00 | 1,00 |       | 0,00 | 64,00 | 10,00 |
| 1,00 | 0,00 | 4,00  | 0,00 | 57,00 | 9,00  |
| 0,00 | 0,00 | 4,00  | 0,00 | 51,00 | 9,00  |
| 0,00 | 0,00 | 35,00 | 0,00 | 50,00 | 8,00  |
| 0,00 | 1,00 |       | 0,00 | 51,00 | 13,00 |
| 0,00 | 0,00 | 8,00  | 0,00 | 51,00 | 13,00 |
| 1,00 | 1,00 |       | 0,00 | 56,00 | 13,00 |
| 1,00 | 1,00 |       | 0,00 | 58,00 | 8,00  |
| 1,00 | 0,00 | 19,00 | 0,00 | 49,00 | 10,00 |
| 0,00 | 0,00 | 6,00  | 0,00 | 52,00 | 4,00  |
| 0,00 | 1,00 |       | 0,00 | 41,00 | 4,00  |
| 0,00 | 0,00 | 4,00  | 0,00 | 42,00 | 7,00  |

|      |      |       |      |       |       |
|------|------|-------|------|-------|-------|
|      | 1,00 |       | 0,00 | 44,00 | 8,00  |
| 0,00 | 1,00 |       | 0,00 |       | 10,00 |
| 1,00 | 0,00 | 3,00  | 0,00 | 51,00 | 10,00 |
| 0,00 | 1,00 |       | 0,00 | 50,00 | 11,00 |
| 0,00 | 0,00 | 6,00  | 0,00 |       | 11,00 |
| 0,00 | 0,00 | 4,00  | 0,00 | 50,00 | 11,00 |
| 0,00 | 0,00 | 1,00  | 0,00 | 55,00 | 10,00 |
| 0,00 | 0,00 | 4,00  | 0,00 |       | 4,00  |
| 0,00 | 1,00 |       | 0,00 | 56,00 | 17,00 |
| 0,00 | 1,00 |       | 0,00 | 63,00 | 11,00 |
| 0,00 | 0,00 | 7,00  | 0,00 | 64,00 | 11,00 |
| 0,00 | 0,00 | 21,00 | 0,00 | 53,00 | 10,00 |
| 0,00 | 0,00 | 4,00  | 0,00 | 55,00 | 12,00 |
| 1,00 | 0,00 | 10,00 | 0,00 | 55,00 | 12,00 |
| 0,00 | 0,00 | 2,00  | 0,00 | 62,00 | 6,00  |
| 0,00 | 1,00 |       | 0,00 | 48,00 | 6,00  |
| 0,00 | 1,00 |       | 0,00 | 42,00 | 3,00  |
| 0,00 | 0,00 | 8,00  | 0,00 | 41,00 | 12,00 |
| 0,00 | 1,00 |       | 0,00 | 54,00 | 5,00  |
| 0,00 | 1,00 |       | 0,00 | 57,00 | 13,00 |
|      | 1,00 |       | 0,00 | 59,00 | 13,00 |
| 1,00 | 1,00 |       | 0,00 |       | 10,00 |
| 0,00 | 1,00 |       | 0,00 | 46,00 | 7,00  |
| 0,00 | 0,00 | 3,00  | 0,00 | 45,00 | 7,00  |
|      | 1,00 |       | 0,00 | 44,00 | 8,00  |
| 1,00 | 1,00 |       | 0,00 | 40,00 | 4,00  |
| 0,00 | 0,00 | 41,00 | 1,00 | 33,00 | 3,00  |
| 0,00 | 0,00 | 6,00  | 1,00 | 33,00 | 10,00 |
| 0,00 | 0,00 | 6,00  | 0,00 | 53,00 | 11,00 |
|      | 0,00 | 9,00  | 0,00 | 51,00 | 11,00 |
| 0,00 | 1,00 |       | 0,00 | 50,00 | 9,00  |
| 1,00 | 1,00 |       | 0,00 | 47,00 | 11,00 |
|      | 1,00 |       | 0,00 | 53,00 | 13,00 |
|      | 1,00 |       | 0,00 | 56,00 | 13,00 |
| 0,00 | 0,00 | 6,00  | 0,00 | 72,00 | 5,00  |
| 0,00 | 0,00 | 3,00  | 0,00 | 43,00 | 12,00 |
| 0,00 | 0,00 | 4,00  | 0,00 | 53,00 | 17,00 |
| 0,00 | 1,00 |       | 0,00 | 54,00 | 11,00 |
